# Supplementary material
Source: publisher figshare collection journal article supplement (https://gsapubs.figshare.com/ndownloader/files/34470368)
Supplement: Supplementary file 1 [file 34470368]

## Sheet: This study
DATA FROM THIS STUDY
Present-day Depleted Mantle parameters used are 147Sm/144Nd = 0.2136, 143Nd/ 144Nd = 0.513163 (Goldstein et al., 1984). Present-day CHUR parameters used are 147Sm/144Nd = 0.1966 and 143Nd/ 144Nd = 0.512638 (Jacobsen and Wasserburg, 1980).
The "0" indice in the isotpes represents the present day value, and the "T" indice represents initial value (at the time of formation).
~Age T (Ma) represents an average of the age for rocks that have age (T) data with errors.
TDM not calculated for samples with 147Sm/144Nd > 0.14.
																					Additional data for maximum and minimum eNd - Calculated for samples that have age (t) data with errors - Source for εNd error bars in graphs
WHOLE ROCKS (analyzed through SOLUTION ICPMS)																					WHOLE ROCKS (analyzed through SOLUTION ICPMS)
Label in graph	Deposit	Sample name	Lithology	Sm (ppm)	Nd (ppm)	147Sm/144Nd	143Nd/144Nd 0	2SE on 143Nd/144Nd 0	ε Nd 0	2SE on ε Nd 0	~Age t (Ma)	143Nd/144Nd t	εNd t	2SE on εNd t	TDM (Ga)	CHUR at age t		Age t range (Ma)	Age reference		t max (Ma)	143Nd/144Nd at t max	CHUR at t max	εNd at t max		t min (Ma)	143Nd/144Nd at t min	CHUR at t min	εNd at t min
Felsic intrusions	Mactung	18-MA-13	Granitoid (Mactung North Pluton)	2.05344	9.2378	0.134407	0.511603	9.5423e-06	-20.1888	0.186141	97.6	0.511517	-19.4177	0.186187	2.97896	0.512512		97.6 ± 0.2 Ma	Gebru (2017)		97.8	0.511517	0.512512	-19.4161		97.4	0.511517	0.512513	-19.4193
		18-MA-03	Granitoid (Mactung South Pluton)	3.22434	15.7363	0.123893	0.511593	9.75796e-06	-20.3806	0.190348	97.6	0.511514	-19.4785	0.190395	2.64962	0.512512		97.6 ± 0.2 Ma	Gebru (2017)		97.8	0.511514	0.512512	-19.4767		97.4	0.511514	0.512513	-19.4804
Metasediments		MS161 322-322.3 A	Argillite (Unit 1)	6.66611	37.9844	0.106115	0.511656	8.28013e-06	-19.1522	0.16152	582	0.511252	-12.4317	0.161757	2.1267	0.511888		635-529 Ma (Lower Cambrian and (?) late Neoproterozoic Vampire Fm	Gordey and Anderson (1993)		635	0.511215	0.511819	-11.8175		529	0.511288	0.511956	-13.0456
		MS177 86.2-86.3	Argillite (Unit 1)	7.93342	43.8758	0.109331	0.511647	9.703e-06	-19.3228	0.189276	582	0.511231	-12.8422	0.189553	2.2044	0.511888		635-529 Ma (Lower Cambrian and (?) late Neoproterozoic Vampire Fm	Gordey and Anderson (1993)		635	0.511192	0.511819	-12.2499		529	0.511269	0.511956	-13.4342
		18-MA-10	Argillite (Unit 1)	8.50305	51.5148	0.0998049	0.51132	9.19881e-06	-25.7112	0.179441	582	0.510939	-18.5303	0.179704	2.45451	0.511888		635-529 Ma (Lower Cambrian and (?) late Neoproterozoic Vampire Fm	Gordey and Anderson (1993)		635	0.510905	0.511819	-17.8739		529	0.510974	0.511956	-19.1862
Felsic intrusions	Cantung	S12-39 913	Granitoid (Mine Stock pluton)	3.44521	15.912	0.130919	0.511842	8.51228e-06	-15.5366	0.166049	98.2	0.511757	-14.7158	0.166089	2.42159	0.512512		98.2 ± 0.4 Ma	Rasmussen (2013)		98.6	0.511757	0.512511	-14.7125		97.8	0.511758	0.512512	-14.7192
		S13-06 666.5-668	Granitoid (Mine Stock pluton)	4.59788	23.7064	0.117274	0.511853	6.79615e-06	-15.3046	0.132572	98.2	0.511778	-14.3128	0.132605	2.06264	0.512512		98.2 ± 0.4 Ma	Rasmussen (2013)		98.6	0.511778	0.512511	-14.3087		97.8	0.511778	0.512512	-14.3168
		18-CA-11	Aplite dyke	5.90705	31.6341	0.112908	0.511824	1.07021e-05	-15.8864	0.208765	98.3	0.511751	-14.8389	0.208816	2.01853	0.512512		97.3 ±0.3 Ma	Rasmussen (2013)		98.6	0.511751	0.512511	-14.8357		98	0.511751	0.512512	-14.8421
Lamprophyre		18-CA-37	Lamprophyre dyke	6.06298	29.5595	0.124022	0.512056	9.8614e-06	-11.3593	0.192366	96.7	0.511977	-10.4649	0.192412	1.87646	0.512514		96.7 ± 0.8 Ma	Rasmussen (2013)		90.2	0.511982	0.512522	-10.5251		91.8	0.511981	0.51252	-10.5103
Metasediments		18-CA-05	Limestone (Swiss-Cheese)	5.4067	26.7441	0.12224	0.511666	4.64211e-06	-18.964	0.0905534	525	0.511245	-13.9867	0.090673	2.48273	0.511961		541-509 Ma (Lower Cambrian Sekwi Fm)	Blusson (1968)		541	0.511233	0.511941	-13.8346		509	0.511258	0.511982	-14.1389
		U2602-140	Argillite (Upper)	6.06032	33.1521	0.110533	0.51154	7.9902e-06	-21.4223	0.155864	525	0.51116	-15.6618	0.15607	2.38703	0.511961		541-509 Ma (Lower Cambrian Sekwi Fm)	Blusson (1968)		541	0.511148	0.511941	-15.4857		509	0.511171	0.511982	-15.8379
		18-CA-10	Argillite (Lower)	5.32067	30.1879	0.106572	0.511601	8.11778e-06	-20.2267	0.158353	582	0.511195	-13.5419	0.158585	2.21322	0.511888		635-529 Ma (Lower Cambrian and (?) late Neoproterozoic Vampire Fm	Blusson (1968)		635	0.511158	0.511819	-12.9309		529	0.511232	0.511956	-14.1525
SCHEELITE (analyzed through SOLUTION ICPMS)																					SCHEELITE (analyzed through SOLUTION ICPMS)
	Deposit	Sample name	Facies	Sm (ppm)	Nd (ppm)	147Sm/144Nd	143Nd/144Nd 0	2SE on 143Nd/144Nd 0	ε Nd 0	2SE on ε Nd 0	~Age t (Ma)	143Nd/144Nd t	εNd t	2SE on εNd t	TDM (Ga)	CHUR at age t		Age t range (Ma)	Age reference
	Mactung	MS161 322-322.3 A	Argillite (Unit 1)	10.7912	55.7721	0.116993	0.511676	5.48592e-06	-18.7612	0.107013	97.5	0.511602	-17.7738	0.10704	2.33288	0.512513		97.5 ± 0.5 Ma	Selby et al. (2003) (Re–Os in molybdenite)		97	0.511602	0.512513	-17.7788		98	0.511601	0.512512	-17.7687
		MS231 60-60.3	Pyroxene skarn (Unit 3E)	15.5624	80.0556	0.117542	0.511839	6.23142e-06	-15.5817	0.121556	97.5	0.511764	-14.6003	0.121586	2.09065	0.512513		97.5 ± 0.5 Ma	Selby et al. (2003) (Re–Os in molybdenite)		97	0.511765	0.512513	-14.6054		98	0.511764	0.512512	-14.5953
		18-MA-02	Garnet-pyroxene skarn (Unit 3E)	22.7622	100.247	0.137295	0.511608	5.87514e-06	-20.0943	0.114606	97.5	0.51152	-19.3599	0.114634	3.0809	0.512513		97.5 ± 0.5 Ma	Selby et al. (2003) (Re–Os in molybdenite)		97	0.511521	0.512513	-19.3636		98	0.51152	0.512512	-19.3561
		MS161 185.6-185.9	Amphibole-rich facies (Unit 3F)	10.7912	55.7721	0.116993	0.511676	5.48592e-06	-18.7612	0.107013	97.5	0.511602	-17.7738	0.10704	2.33288	0.512513		97.5 ± 0.5 Ma	Selby et al. (2003) (Re–Os in molybdenite)		97	0.511602	0.512513	-17.7788		98	0.511601	0.512512	-17.7687
	Cantung	18-CA-28	Biotite-rich facies (Ore Limestone)	97.3497	252.823	0.232824	0.511646	7.30293e-06	-19.3559	0.142458	94.6	0.511502	-19.7967	0.142492	N/A	0.512516		94.6 ± 2.1 Ma	Elongo et al. unpublished (Re–Os in molybdenite)		92.5	0.511505	0.512519	-19.7869		96.7	0.511498	0.512514	-19.8064
		18-CA-29b	Amphibole-rich facies (Swiss-Cheese Limestone)	6.86875	37.1693	0.111739	0.512139	6.41473e-06	-9.72764	0.125132	94.6	0.51207	-8.70402	0.125162	1.52749	0.512516		94.6 ± 2.1 Ma	Elongo et al. unpublished (Re–Os in molybdenite)		92.5	0.512072	0.512519	-8.72676		96.7	0.512069	0.512514	-8.68128
		18-CA-31a	Pyroxene skarn (Swiss-Cheese Limestone)	92.1655	231.882	0.240332	0.511646	5.66176e-06	-19.3419	0.110444	94.6	0.511498	-19.8734	0.11047	N/A	0.512516		94.6 ± 2.1 Ma	Elongo et al. unpublished (Re–Os in molybdenite)		92.5	0.511501	0.512519	-19.8616		96.7	0.511494	0.512514	-19.8852
		18-CA-47	Garnet-pyroxene skarn (Ore Limestone)	25.8645	87.8132	0.178096	0.51182	9.09499e-06	-15.948	0.177415	94.6	0.51171	-15.7271	0.177458	N/A	0.512516		94.6 ± 2.1 Ma	Elongo et al. unpublished (Re–Os in molybdenite)		92.5	0.511713	0.512519	-15.732		96.7	0.511708	0.512514	-15.7222
		18-CA-50	Quartz vein in Mine Stock pluton	227.215	493.936	0.278148	0.511899	5.41308e-06	-14.4193	0.105593	94.6	0.511727	-15.4062	0.105618	N/A	0.512516		94.6 ± 2.1 Ma	Elongo et al. unpublished (Re–Os in molybdenite)		92.5	0.51173	0.512519	-15.3843		96.7	0.511723	0.512514	-15.4281
		18-CA-50	Quartz vein in Mine Stock pluton	237.951	604.479	0.238022	0.511855	6.25975e-06	-15.2692	0.122109	94.6	0.511708	-15.7718	0.122138	N/A	0.512516		94.6 ± 2.1 Ma	Elongo et al. unpublished (Re–Os in molybdenite)		92.5	0.511711	0.512519	-15.7607		96.7	0.511705	0.512514	-15.783
		18-CA-10	Argillite (Lower)	11.7372	38.3114	0.185245	0.5117	5.98575e-06	-18.3066	0.116764	94.6	0.511585	-18.1727	0.116791	N/A	0.512516		94.6 ± 2.1 Ma	Elongo et al. unpublished (Re–Os in molybdenite)		92.5	0.511587	0.512519	-18.1756		96.7	0.511582	0.512514	-18.1697
		18-CA-51	Argillite (Upper)	5.12703	16.8769	0.183688	0.511699	4.91983e-05	-18.3265	0.959708	94.6	0.511585	-18.1737	0.959936	N/A	0.512516		94.6 ± 2.1 Ma	Elongo et al. unpublished (Re–Os in molybdenite)		92.5	0.511587	0.512519	-18.1771		96.7	0.511582	0.512514	-18.1704
SCHEELITE (analyzed through LASS ICPMS; transects through grains)																					SCHEELITE (analyzed through LASS ICPMS)
	Deposit	Sample name	Facies	Sm (ppm)	Nd (ppm)	147Sm/144Nd	143Nd/144Nd 0	2SE on 143Nd/144Nd 0	ε Nd 0	2SE on ε Nd 0	~Age t (Ma)	143Nd/144Nd t	εNd t	2SE on εNd t	TDM (Ga)	CHUR at age t		Age t range (Ma)	Age reference
	Mactung	MS231 60-60.3	Pyroxene skarn (Unit 3E)	10.01	47.22	0.134146	0.51198	0.0001	-12.8356	1.95069	97.5	0.511894	-12.0602	1.95117	2.25703	0.512513		97.5 ± 0.5 Ma	Selby et al. (2003) (Re–Os in molybdenite)		97	0.511895	0.512513	-12.0642		98	0.511894	0.512512	-12.0562
		MS231 60-60.3	Pyroxene skarn (Unit 3E)	14.36	79.7	0.11619	0.511957	8.5e-05	-13.2842	1.65809	97.5	0.511883	-12.2855	1.6585	1.87954	0.512513		97.5 ± 0.5 Ma	Selby et al. (2003) (Re–Os in molybdenite)		97	0.511883	0.512513	-12.2906		98	0.511883	0.512512	-12.2804
		MS231 60-60.3	Pyroxene skarn (Unit 3E)	15.19	75.6	0.104803	0.51195	0.00011	-13.4208	2.14576	97.5	0.511883	-12.2804	2.14629	1.6938	0.512513		97.5 ± 0.5 Ma	Selby et al. (2003) (Re–Os in molybdenite)		97	0.511883	0.512513	-12.2862		98	0.511883	0.512512	-12.2745
		MS231 60-60.3	Pyroxene skarn (Unit 3E)	16.37	78.8	0.119149	0.51189	0.00012	-14.5912	2.34083	97.5	0.511814	-13.6296	2.34141	2.04492	0.512513		97.5 ± 0.5 Ma	Selby et al. (2003) (Re–Os in molybdenite)		97	0.511814	0.512513	-13.6345		98	0.511814	0.512512	-13.6247
		MS231 60-60.3	Pyroxene skarn (Unit 3E)	12.72	58.1	0.127737	0.51189	0.0001	-14.5912	1.95069	97.5	0.511809	-13.7365	1.95117	2.24773	0.512513		94.6 ± 2.1 Ma	Elongo et al. unpublished (Re–Os in molybdenite)		92.5	0.511813	0.512519	-13.7803		96.7	0.511809	0.512514	-13.7435
		MS161 322-322.3 A	Argillite (Unit 1)	28.45	100.5	0.158146	0.511655	3.3e-05	-19.1753	0.643729	97.5	0.511554	-18.7002	0.643887	N/A	0.512513		94.6 ± 2.1 Ma	Elongo et al. unpublished (Re–Os in molybdenite)		92.5	0.511559	0.512519	-18.7246		96.7	0.511555	0.512514	-18.7041
		MS161 322-322.3 A	Argillite (Unit 1)	14.29	36.28	0.172236	0.51159	0.0001	-20.4433	1.95069	97.5	0.51148	-20.1438	1.95117	N/A	0.512513		94.6 ± 2.1 Ma	Elongo et al. unpublished (Re–Os in molybdenite)		92.5	0.511486	0.512519	-20.1592		96.7	0.511481	0.512514	-20.1463
		MS161 322-322.3 A	Argillite (Unit 1)	19.75	67.3	0.172604	0.51162	0.00012	-19.8581	2.34083	97.5	0.51151	-19.563	2.34141	N/A	0.512513		94.6 ± 2.1 Ma	Elongo et al. unpublished (Re–Os in molybdenite)		92.5	0.511516	0.512519	-19.5782		96.7	0.511511	0.512514	-19.5655
		MS161 322-322.3 A	Argillite (Unit 1)	12.23	42.6	0.250459	0.51166	6.7e-05	-19.0778	1.30697	97.5	0.5115	-19.7515	1.30729	N/A	0.512513		94.6 ± 2.1 Ma	Elongo et al. unpublished (Re–Os in molybdenite)		92.5	0.511508	0.512519	-19.717		96.7	0.511502	0.512514	-19.746
	Cantung	18-CA-50	Quartz vein in Mine Stock pluton	268.7	809.3	0.20003	0.511804	2.2e-05	-16.2688	0.429153	94.6	0.51168	-16.3129	0.429255	N/A	0.512516		94.6 ± 2.1 Ma	Elongo et al. unpublished (Re–Os in molybdenite)		92.5	0.511683	0.512519	-16.3119		96.7	0.511677	0.512514	-16.3138
		18-CA-50	Quartz vein in Mine Stock pluton	303.2	874	0.212363	0.511807	2.5e-05	-16.2103	0.487674	94.6	0.511676	-16.4032	0.487789	N/A	0.512516		94.6 ± 2.1 Ma	Elongo et al. unpublished (Re–Os in molybdenite)		92.5	0.511678	0.512519	-16.399		96.7	0.511673	0.512514	-16.4075
		18-CA-50	Quartz vein in Mine Stock pluton	284.9	837	0.20584	0.51182	2.8e-05	-15.9567	0.546194	94.6	0.511693	-16.0708	0.546324	N/A	0.512516		94.6 ± 2.1 Ma	Elongo et al. unpublished (Re–Os in molybdenite)		92.5	0.511695	0.512519	-16.0683		96.7	0.51169	0.512514	-16.0734
		18-CA-50	Quartz vein in Mine Stock pluton	330	878	0.227633	0.511799	2.6e-05	-16.3663	0.507181	94.6	0.511658	-16.7437	0.507301	N/A	0.512516		94.6 ± 2.1 Ma	Elongo et al. unpublished (Re–Os in molybdenite)		92.5	0.511661	0.512519	-16.7354		96.7	0.511655	0.512514	-16.7521
		18-CA-50	Quartz vein in Mine Stock pluton	315.4	798	0.237923	0.511857	2e-05	-15.2349	0.390139	94.6	0.51171	-15.7363	0.390232	N/A	0.512516		94.6 ± 2.1 Ma	Elongo et al. unpublished (Re–Os in molybdenite)		92.5	0.511713	0.512519	-15.7252		96.7	0.511706	0.512514	-15.7475
		18-CA-50	Quartz vein in Mine Stock pluton	308.1	789	0.239263	0.511844	2.7e-05	-15.4885	0.526687	94.6	0.511696	-16.0061	0.526813	N/A	0.512516		94.6 ± 2.1 Ma	Elongo et al. unpublished (Re–Os in molybdenite)		92.5	0.511699	0.512519	-15.9947		96.7	0.511693	0.512514	-16.0176
		18-CA-50	Quartz vein in Mine Stock pluton	307	891	0.204927	0.511842	2.8e-05	-15.5275	0.546194	94.6	0.511715	-15.6306	0.546324	N/A	0.512516		94.6 ± 2.1 Ma	Elongo et al. unpublished (Re–Os in molybdenite)		92.5	0.511718	0.512519	-15.6283		96.7	0.511712	0.512514	-15.6328
		18-CA-50	Quartz vein in Mine Stock pluton	238	517.3	0.276107	0.511834	3.8e-05	-15.6836	0.741264	94.6	0.511663	-16.6462	0.74144	N/A	0.512516		94.6 ± 2.1 Ma	Elongo et al. unpublished (Re–Os in molybdenite)		92.5	0.511667	0.512519	-16.6248		96.7	0.511659	0.512514	-16.6675
		18-CA-50	Quartz vein in Mine Stock pluton	358	1020	0.222222	0.511791	2.9e-05	-16.5224	0.565701	94.6	0.511653	-16.8345	0.565836	N/A	0.512516		94.6 ± 2.1 Ma	Elongo et al. unpublished (Re–Os in molybdenite)		92.5	0.511657	0.512519	-16.8276		96.7	0.51165	0.512514	-16.8414
		18-CA-50	Quartz vein in Mine Stock pluton	323.3	799	0.241026	0.511819	2.6e-05	-15.9762	0.507181	94.6	0.51167	-16.5152	0.507301	N/A	0.512516		94.6 ± 2.1 Ma	Elongo et al. unpublished (Re–Os in molybdenite)		92.5	0.511673	0.512519	-16.5033		96.7	0.511667	0.512514	-16.5272
		18-CA-50	Quartz vein in Mine Stock pluton	355.4	921	0.229868	0.511818	1.9e-05	-15.9957	0.370632	94.6	0.511676	-16.4	0.37072	N/A	0.512516		94.6 ± 2.1 Ma	Elongo et al. unpublished (Re–Os in molybdenite)		92.5	0.511679	0.512519	-16.391		96.7	0.511673	0.512514	-16.409
		18-CA-50	Quartz vein in Mine Stock pluton	268.9	768.4	0.211946	0.511826	2.7e-05	-15.8396	0.526687	94.6	0.511695	-16.0275	0.526813	N/A	0.512516		94.6 ± 2.1 Ma	Elongo et al. unpublished (Re–Os in molybdenite)		92.5	0.511698	0.512519	-16.0233		96.7	0.511692	0.512514	-16.0317
		18-CA-50	Quartz vein in Mine Stock pluton	287.3	721.2	0.239036	0.51186	2.7e-05	-15.1764	0.526687	94.6	0.511712	-15.6912	0.526813	N/A	0.512516		94.6 ± 2.1 Ma	Elongo et al. unpublished (Re–Os in molybdenite)		92.5	0.511715	0.512519	-15.6798		96.7	0.511709	0.512514	-15.7027
		18-CA-50	Quartz vein in Mine Stock pluton	314.1	793	0.235909	0.511849	2.3e-05	-15.391	0.44866	94.6	0.511703	-15.8681	0.448766	N/A	0.512516		94.6 ± 2.1 Ma	Elongo et al. unpublished (Re–Os in molybdenite)		92.5	0.511706	0.512519	-15.8575		96.7	0.5117	0.512514	-15.8787
		18-CA-50	Quartz vein in Mine Stock pluton	275.5	677	0.251786	0.511837	3.7e-05	-15.6251	0.721757	94.6	0.511681	-16.2939	0.721928	N/A	0.512516		94.6 ± 2.1 Ma	Elongo et al. unpublished (Re–Os in molybdenite)		92.5	0.511685	0.512519	-16.2791		96.7	0.511678	0.512514	-16.3088
		18-CA-50	Quartz vein in Mine Stock pluton	261.9	787	0.203577	0.511824	2.9e-05	-15.8787	0.565701	94.6	0.511698	-15.9655	0.565836	N/A	0.512516		94.6 ± 2.1 Ma	Elongo et al. unpublished (Re–Os in molybdenite)		92.5	0.511701	0.512519	-15.9635		96.7	0.511695	0.512514	-15.9674
		18-CA-50	Quartz vein in Mine Stock pluton	236.6	741	0.194792	0.511809	3.1e-05	-16.1713	0.604715	94.6	0.511688	-16.1521	0.604859	N/A	0.512516		94.6 ± 2.1 Ma	Elongo et al. unpublished (Re–Os in molybdenite)		92.5	0.511691	0.512519	-16.1525		96.7	0.511686	0.512514	-16.1516
		18-CA-50	Quartz vein in Mine Stock pluton	299.4	785	0.229374	0.511834	3.1e-05	-15.6836	0.604715	94.6	0.511692	-16.0819	0.604859	N/A	0.512516		94.6 ± 2.1 Ma	Elongo et al. unpublished (Re–Os in molybdenite)		92.5	0.511695	0.512519	-16.073		96.7	0.511689	0.512514	-16.0907
		18-CA-50	Quartz vein in Mine Stock pluton	201.2	606.1	0.201631	0.511808	3.4e-05	-16.1908	0.663236	94.6	0.511683	-16.2542	0.663394	N/A	0.512516		94.6 ± 2.1 Ma	Elongo et al. unpublished (Re–Os in molybdenite)		92.5	0.511686	0.512519	-16.2527		96.7	0.51168	0.512514	-16.2556
		18-CA-50	Quartz vein in Mine Stock pluton	308.5	780	0.235577	0.511853	2.9e-05	-15.3129	0.565701	94.6	0.511707	-15.786	0.565836	N/A	0.512516		94.6 ± 2.1 Ma	Elongo et al. unpublished (Re–Os in molybdenite)		92.5	0.51171	0.512519	-15.7755		96.7	0.511704	0.512514	-15.7965
		18-CA-10	Argillite (Lower)	73	251.7	0.18139	0.511687	4.5e-05	-18.5511	0.877812	94.6	0.511575	-18.3706	0.878021	N/A	0.512516		94.6 ± 2.1 Ma	Elongo et al. unpublished (Re–Os in molybdenite)		92.5	0.511577	0.512519	-18.3746		96.7	0.511572	0.512514	-18.3666
		18-CA-10	Argillite (Lower)	67.6	255	0.164754	0.51158	0.00011	-20.6383	2.14576	94.6	0.511478	-20.2575	2.14627	N/A	0.512516		94.6 ± 2.1 Ma	Elongo et al. unpublished (Re–Os in molybdenite)		92.5	0.51148	0.512519	-20.266		96.7	0.511476	0.512514	-20.249
Average LASS ICPMS data used for plotting purposes
	Deposit	Sample name	Facies	Sm (ppm)	Nd (ppm)	147Sm/144Nd	143Nd/144Nd 0	2SE on 143Nd/144Nd 0	ε Nd 0	2SE on ε Nd 0	~Age t (Ma)	143Nd/144Nd t	εNd t	2SE on εNd t	TDM (Ga)	CHUR at age t		Age t range (Ma)	Age reference		Average LASS ICPMS data used for plotting purposes
	Mactung	MS231 60-60.3	Pyroxene skarn (Unit 3E)	13.73	67.884	0.120405	0.511933	0.00010375	-13.7446	2.02385	97.5	0.511857	-12.7984	2.02434	2.00209	0.512513		97.5 ± 0.5 Ma	Selby et al. (2003) (Re–Os in molybdenite)		97	0.511857	0.512513	-12.8033		98	0.511856	0.512512	-12.7936
		MS161 322-322.3 A	Argillite (Unit 1)	18.68	61.67	0.188361	0.511631	8e-05	-19.6386	1.56056	97.5	0.511511	-19.5396	1.56094	N/A	0.512513		97.5 ± 0.5 Ma	Selby et al. (2003) (Re–Os in molybdenite)		97	0.511512	0.512513	-19.5401		98	0.51151	0.512512	-19.5391
	Cantung	18-CA-50	Quartz vein in Mine Stock pluton	292.27	789.615	0.225041	0.511827	2.78e-05	-15.825	0.542293	94.6	0.511687	-16.171	0.542422	N/A	0.512516		94.6 ± 2.1 Ma	Elongo et al. unpublished (Re–Os in molybdenite)		92.5	0.511691	0.512519	-16.1633		96.7	0.511684	0.512514	-16.1787
		18-CA-10	Argillite (Lower)	70.3	253.35	0.173072	0.511634	7.75e-05	-19.5947	1.51179	94.6	0.511526	-19.3141	1.51215	N/A	0.512516		94.6 ± 2.1 Ma	Elongo et al. unpublished (Re–Os in molybdenite)		92.5	0.511529	0.512519	-19.3203		96.7	0.511524	0.512514	-19.3078

## Sheet: Literature
LITERATURE DATA		RED = RAW DATA FROM THE LITERATURE; GREEN=CALCULATED IN THIS STUDY FROM LITERATURE DATA
Present-day Depleted Mantle parameters used are 147Sm/144Nd = 0.2136, 143Nd/ 144Nd = 0.513163 (Goldstein et al., 1984). Present-day CHUR parameters used are 147Sm/144Nd = 0.1966 and 143Nd/ 144Nd = 0.512638 (Jacobsen and Wasserburg, 1980).
The "0" indice in the isotpes represents the present day value, and the "T" indice represents initial value (at the time of formation).
~Age T (Ma) represents an average of the age for rocks that have age (T) data with errors.
TDM not calculated for samples with 147Sm/144Nd > 0.14.
																					Additional data for maximum and minimum eNd - Calculated for samples that have age (t) data with errors - Source for εNd error bars in graphs
IGNEOUS / META-IGNEOUS UNITS																					IGNEOUS / META-IGNEOUS UNITS
Label in graph	Sample name	Lithology	Geological object / Location	Sm (ppm)	Nd (ppm)	147Sm/144Nd	143Nd/144Nd 0	2SE on 143Nd/144Nd 0	ε Nd 0	2SE on ε Nd 0	143Nd/144Nd t	TDM (Ga)	~Age t (Ma)	CHUR at age t	ε Nd t	2SE on ε Nd t		Age t range (Ma)	Raw data source		t max (Ma)	143Nd/144Nd at t max	CHUR at t max	ε Nd at t max		t min (Ma)	143Nd/144Nd at t min	CHUR at t min	ε Nd at t min
Lamprophyre			Central Yukon
	Minette	Lamprophyre (Minette)	Scheelite Dome	7.82	37.1	0.12746	0.512067	0.00015	-11.1385	2.92604	0.511992	1.93098	90.2	0.512522	-10.3438	2.9267		90.2 ± 0.5	Mair et al. (2011)		89.7	0.511992	0.512523	-10.3482		90.7	0.511991	0.512521	-10.3394
	East Ridge minette (ERM)	Lamprophyre (Minette)	Scheelite Dome	7.66	37.1	0.124852	0.512086	7e-05	-10.7678	1.36549	0.512012	1.84234	90.2	0.512522	-9.94306	1.3658		90.2 ± 0.5	Mair et al. (2011)		89.7	0.512013	0.512523	-9.94764		90.7	0.512012	0.512521	-9.93849
	ERM - Cpx	Lamprophyre (Minette)	Scheelite Dome	10.69	51	0.12675	0.51209	7e-05	-10.6898	1.36549	0.512015	1.87536	90.2	0.512522	-9.88687	1.3658		90.2 ± 0.5	Mair et al. (2011)		89.7	0.512016	0.512523	-9.89132		90.7	0.512015	0.512521	-9.88242
	ERM - apatite	Lamprophyre (Minette)	Scheelite Dome	0.71	4.2	0.102223	0.512068	8.28013e-06	-11.119	0.16152	0.512008	1.49461	90.2	0.512522	-10.0337	0.161557		90.2 ± 0.5	Mair et al. (2011)		89.7	0.512008	0.512523	-10.0398		90.7	0.512007	0.512521	-10.0277
	ERM - K-spar	Lamprophyre (Minette)	Scheelite Dome	0.68	3.5	0.117485	0.512068	8.28013e-06	-11.119	0.16152	0.511999	1.73034	90.2	0.512522	-10.2094	0.161557		90.2 ± 0.5	Mair et al. (2011)		89.7	0.511999	0.512523	-10.2145		90.7	0.511998	0.512521	-10.2044
	SD-104A	Lamprophyre (Spessartite)	Scheelite Dome	4.46	23.3	0.115749	0.512176	0.00027	-9.01221	5.26687	0.512108	1.53304	90.2	0.512522	-8.08224	5.26807		90.2 ± 0.5	Mair et al. (2011)		89.7	0.512108	0.512523	-8.0874		90.7	0.512107	0.512521	-8.07708
	SD-103 A	Lamprophyre (Spessartite)	Scheelite Dome	4.68	25.1	0.112749	0.512164	0.00017	-9.24629	3.31618	0.512097	1.50569	90.2	0.512522	-8.28183	3.31693		90.2 ± 0.5	Mair et al. (2011)		89.7	0.512098	0.512523	-8.28718		90.7	0.512097	0.512521	-8.27648
	KR-05-157	Mafic dyke	Near Roy pluton (SW Northwest Territories)	7.2	42.4	0.1031	0.51228	7e-05	-6.98349	1.36549	0.512215	1.21591	96.5	0.512514	-5.83222	1.36582		96.5 ± 0.7	Rasmussen (2013)
	KR-05-213	Lamprophyre (kersantite )	Cantung deposit (SW Northwest Territories)	8.2	46.4	0.1063	0.51215	5e-05	-9.51939	0.975347	0.512083	1.43545	96.7	0.512514	-8.40585	0.975584		96.7 ± 0.8	Rasmussen (2013)
	KR-05-77	Lamprophyre (kersantite )	Near Pelly river pluton (Eastern Yukon)	9.9	57.9	0.1038	0.51161	7e-05	-20.0531	1.36549	0.511545	2.14558	95.7	0.512515	-18.9231	1.36581		95.7 ± 0.7	Rasmussen (2013)
Felsic (meta-) igneous rocks			Northeastern Yukon
	1	Quartz syenite	Bonnet Plume River Intrusions	19.02	79.3	0.145	0.511997	9e-06	-12.504	0.175562	0.510365	2.57338	1711	0.510425	-1.16043	0.176324		1711.1± 5.1	Thorkelson et al. (2001)			0.511997	0.512638	-12.504			0.511997	0.512638	-12.504
	2	Diorite	Bonnet Plume River Intrusions	16.73	81.51	0.1241	0.511736	9e-06	-17.5953	0.175562	0.510341	2.41603	1709	0.510427	-1.68503	0.176323		1709± 1.4	Thorkelson et al. (2001)			0.511736	0.512638	-17.5953			0.511736	0.512638	-17.5953
	Imperial Sikanni Chief (at 3 km depth drillcore)	Monzogranite	Fort Simpson magnetic High (Northeastern British Columbia)	2.5	17.34	0.087	0.511367	1.6e-05	-24.7933	0.312111	0.510311	2.15225	1845	0.51025	1.18944	0.313572		1845± 3	Villeneuve et al. (1991)		1842	0.510313	0.510254	1.14674		1848	0.510309	0.510246	1.23214
	Imperial Island River (at 2.5 km depth drillcore)	Granodiorite	Fort Simpson magnetic High (Southern Yukon)	9.59	51.75	0.1112	0.511505	6e-06	-22.1014	0.117042	0.510155	2.45354	1845	0.51025	-1.86344	0.117589		1845± 3	Villeneuve et al. (1991)		1842	0.510157	0.510254	-1.8967		1848	0.510153	0.510246	-1.83018
			Northern Alberta
	Imperial Wolverine	Syenogranite	Taltson domain	3.25	20.77	0.0944	0.511056		-30.86	0	0.509704	2.67694	2174	0.509821	-2.29715			2174± 54	Theriault and Ross (1991)		2120	0.509738	0.509892	-3.0154		2228	0.50967	0.509751	-1.57845
	Merrill Arab Chard	Syenogranite	Taltson domain	0.92	7.84	0.0711	0.510818		-35.5026	0	0.509895	2.49401	1973	0.510083	-3.70193			1973± 5	Theriault and Ross (1991)		1968	0.509897	0.51009	-3.78344		1978	0.509892	0.510077	-3.62041
	ROC Watchusk Lake	Monzogranite	Taltson domain	7.37	66.59	0.0669	0.51048		-42.096	0	0.509622	2.76935	1948	0.510116	-9.67976			1948±4	Theriault and Ross (1991)		1944	0.509624	0.510121	-9.74707		1952	0.50962	0.510111	-9.61244
	Bear Vampire # 1	Monzogranite	Taltson domain	9.11	58.37	0.0943	0.511039		-31.1916	0	0.50984	2.69611	1932	0.510137	-5.82077			1932	Theriault and Ross (1991)		1932	0.50984	0.510137	-5.82077		1932	0.50984	0.510137	-5.82077
	California Standard Mikkwa	Biotite-hornblende granite	Taltson domain	15.49	117.35	0.0798	0.510878		-34.3322	0	0.509861	2.58731	1937	0.51013	-5.28676			1937±61	Theriault and Ross (1991)		1876	0.509893	0.51021	-6.21146		1998	0.509828	0.510051	-4.3614
	Chevron Irving Cadotte	Granitic gneiss	Buffalo Head domain	5.42	28.04	0.1168	0.511444		-23.2913	0	0.509778	2.68875	2165	0.509833	-1.07174			2165±5	Theriault and Ross (1991)		2160	0.509782	0.50984	-1.1237		2170	0.509775	0.509827	-1.01977
	Fina Keg River	Granitic gneiss	Buffalo Head domain	9.5	57.56	0.0998	0.51124		-27.2707	0	0.509931	2.55998	1993	0.510057	-2.48437			1993±10	Theriault and Ross (1991)		1983	0.509937	0.51007	-2.61017		2003	0.509924	0.510044	-2.35855
	Canadian Hunter et al. Golden	Granitic gneiss	Buffalo Head domain	6.16	24.85	0.1499	0.511704		-18.2195	0	0.50974	N/A	1990	0.510061	-6.29211			1990±13	Theriault and Ross (1991)		1977	0.509753	0.510078	-6.37092		2003	0.509727	0.510044	-6.21328
	Imperial Pelican Hills	Granitic gneiss	Buffalo Head domain	6.87	45.78	0.0907	0.510926		-33.3959	0	0.509722	2.7559	2017	0.510026	-5.96973			2017±2	Theriault and Ross (1991)		2015	0.509723	0.510029	-5.99725		2019	0.50972	0.510023	-5.94222
	Fina IOE Buffalo Creek	Granitic gneiss	Buffalo Head domain	3.28	14.58	0.1358	0.511441		-23.3498	0	0.509471	3.34319	2202	0.509785	-6.15218			2202±196	Theriault and Ross (1991)		2006	0.509648	0.51004	-7.70085		2398	0.509294	0.509529	-4.59997
	Dome et al. Peavine	Leucogranite	Buffalo Head domain	13.19	71.61	0.1114	0.511457		-23.0377	0	0.509937	2.52889	2072	0.509954	-0.338124			2072±6	Theriault and Ross (1991)		2066	0.509942	0.509962	-0.404649		2078	0.509933	0.509947	-0.271595
	Chevron Hunt Creek	Biotite-hornblende granite	Buffalo Head domain	11.93	58.49	0.1233	0.511461		-22.9597	0	0.509845	2.85205	1991	0.51006	-4.21517			1991±225	Theriault and Ross (1991)		1766	0.510029	0.510353	-6.35525		2216	0.509661	0.509767	-2.06947
	Clear Hills	Felsic metavolcanic	Buffalo Head domain	6.07	29.9	0.1288	0.511549		-21.2431	0	0.509634	2.87953	2257	0.509713	-1.55596			2257±25	Theriault and Ross (1991)		2232	0.509655	0.509746	-1.77687		2282	0.509612	0.50968	-1.33499
	Chevron et al. Sheldon	Monzonite gneiss	Chinchaga domain	22.91	118.48	0.1168	0.511437		-23.4278	0	0.509776	2.6996	2159	0.509841	-1.27139			2159±11	Theriault and Ross (1991)		2148	0.509785	0.509855	-1.38569		2170	0.509768	0.509827	-1.15708
	Two Creek	Quartzofeldspathic gneiss	Chinchaga domain	14.68	73.59	0.1205	0.511573		-20.7749	0	0.509838	2.58657	2186	0.509806	0.631871			2186±68	Theriault and Ross (1991)		2118	0.509892	0.509894	-0.04226		2254	0.509784	0.509717	1.30654
	Scurry Rainbow Caribou Banff	Porphyritic granite	Chinchaga domain	4.96	31.82	0.0943	0.511213		-27.7974	0	0.509916	2.47702	2088	0.509934	-0.335018			2088±23	Theriault and Ross (1991)		2065	0.509931	0.509964	-0.64117		2111	0.509902	0.509904	-0.0287849
	Phillips Ksituan #1	Biotite-hornblende granite	Ksituan domain	15.33	74.92	0.1237	0.511599		-20.2677	0	0.509982	2.63433	1986	0.510067	-1.65978			1986±11	Theriault and Ross (1991)		1975	0.509991	0.510081	-1.76403		1997	0.509973	0.510052	-1.55551
	Honolulu Belloy	Granitic gneiss	Ksituan domain	4.29	21.53	0.1204	0.511532		-21.5747	0	0.509956	2.64988	1988	0.510064	-2.10772			1988±3	Theriault and Ross (1991)		1985	0.509959	0.510068	-2.13744		1991	0.509954	0.51006	-2.078
Mafic (meta-) igneous rocks			Northwestern British Columbia, near Watson Lake
	IIC-6	Basalt	Iskut-Unuk rivers volcanic field (~220km SSW of Watson Lake)	6.75	29.7	0.137432	0.51286	2e-05	4.33054	0.390139	0.512859	0.606262	1.25	0.512636	4.34001	0.39014		2.5-0 (Recent to Quaternary)	Cousens and Bevier (1995)		0	0.51286	0.512638	4.33054		2.5	0.512858	0.512635	4.34947
	IIC-7	Basalt	Iskut-Unuk rivers volcanic field	6.59	26	0.153268	0.51288	2e-05	4.72068	0.390139	0.512879	N/A	1.25	0.512636	4.72762	0.39014		2.5-0 (Recent to Quaternary)	Cousens and Bevier (1995)		0	0.51288	0.512638	4.72068		2.5	0.512877	0.512635	4.73456
	IIC-8	Basalt	Iskut-Unuk rivers volcanic field	5.49	23.4	0.141872	0.51294	2e-05	5.8911	0.390139	0.512939	N/A	1.25	0.512636	5.89986	0.39014		2.5-0 (Recent to Quaternary)	Cousens and Bevier (1995)		0	0.51294	0.512638	5.8911		2.5	0.512938	0.512635	5.90862
	ICG-9	Basalt	Iskut-Unuk rivers volcanic field	5.75	24.4	0.142501	0.51293	2e-05	5.69603	0.390139	0.512929	N/A	1.25	0.512636	5.70469	0.39014		2.5-0 (Recent to Quaternary)	Cousens and Bevier (1995)		0	0.51293	0.512638	5.69603		2.5	0.512928	0.512635	5.71335
	ICG-11	Basalt	Iskut-Unuk rivers volcanic field	5.1	22	0.14018	0.51289	2e-05	4.91575	0.390139	0.512889	N/A	1.25	0.512636	4.92478	0.39014		2.5-0 (Recent to Quaternary)	Cousens and Bevier (1995)		0	0.51289	0.512638	4.91575		2.5	0.512888	0.512635	4.93381
	ICM-20	Basalt	Iskut-Unuk rivers volcanic field	15.07	72.1	0.126392	0.51294	2e-05	5.8911	0.390139	0.512939	0.390047	1.25	0.512636	5.90233	0.39014		2.5-0 (Recent to Quaternary)	Cousens and Bevier (1995)		0	0.51294	0.512638	5.8911		2.5	0.512938	0.512635	5.91356
	IKC-22	Basalt	Iskut-Unuk rivers volcanic field	5.78	24.8	0.140934	0.51292	2e-05	5.50096	0.390139	0.512919	N/A	1.25	0.512636	5.50987	0.39014		2.5-0 (Recent to Quaternary)	Cousens and Bevier (1995)		0	0.51292	0.512638	5.50096		2.5	0.512918	0.512635	5.51878
	ILF-24	Basalt	Iskut-Unuk rivers volcanic field	6.79	29.7	0.138246	0.51289	2e-05	4.91575	0.390139	0.512889	0.552229	1.25	0.512636	4.92509	0.39014		2.5-0 (Recent to Quaternary)	Cousens and Bevier (1995)		0	0.51289	0.512638	4.91575		2.5	0.512888	0.512635	4.93442
	ILF-25	Basalt	Iskut-Unuk rivers volcanic field	6.64	29.1	0.13798	0.51291	2e-05	5.30589	0.390139	0.512909	0.510042	1.25	0.512636	5.31527	0.39014		2.5-0 (Recent to Quaternary)	Cousens and Bevier (1995)		0	0.51291	0.512638	5.30589		2.5	0.512908	0.512635	5.32465
	ILF-30	Basalt	Iskut-Unuk rivers volcanic field	6.87	30	0.138476	0.51288	2e-05	4.72068	0.390139	0.512879	0.574167	1.25	0.512636	4.72998	0.39014		2.5-0 (Recent to Quaternary)	Cousens and Bevier (1995)		0	0.51288	0.512638	4.72068		2.5	0.512878	0.512635	4.73928
			Southwestern Yukon
	RA-20	Basalt	Watson Lake	4.39	17.78	0.149304	0.512961		6.30074	0	0.51296	N/A	1.25	0.512636	6.30832			2.5-0 (Recent to Quaternary)	Abraham et al. (2001)		0	0.512961	0.512638	6.30074		2.5	0.512959	0.512635	6.3159
			Southwestern Yukon
	GM 97 S8	Basaltic andesite to rhyolite	Mount Skukum Volcanic Complex	5.11	28.38	0.109	0.512605	9e-06	-0.643729	0.175562	0.512565	0.812746	56.35	0.512565	-0.0131505	0.175587		57.3–55.4	Morris and Creaser (2003)		55.4	0.512566	0.512567	-0.0237848		57.3	0.512564	0.512564	-0.00251613
	GM 97 S9	Basaltic andesite to rhyolite	Mount Skukum Volcanic Complex	8.31	37.74	0.1331	0.512603	7e-06	-0.682743	0.136549	0.512554	1.0587	56.35	0.512565	-0.225478	0.136568		57.3–55.4	Morris and Creaser (2003)		55.4	0.512555	0.512567	-0.23319		57.3	0.512553	0.512564	-0.217767
	GM 97 S10	Basaltic andesite to rhyolite	Mount Skukum Volcanic Complex	7.74	24.21	0.1937	0.512605	9e-06	-0.643729	0.175562	0.512534	N/A	56.35	0.512565	-0.622247	0.175587		57.3–55.4	Morris and Creaser (2003)		55.4	0.512535	0.512567	-0.622609		57.3	0.512532	0.512564	-0.621884
	GM 97 S17	Basaltic andesite to rhyolite	Mount Skukum Volcanic Complex															57.3–55.4	Morris and Creaser (2003)
	GM 97 S19	Basaltic andesite to rhyolite	Mount Skukum Volcanic Complex	6.59	30.45	0.1313	0.512576	1.3e-05	-1.20943	0.25359	0.512528	1.0854	56.35	0.512565	-0.739296	0.253626		57.3–55.4	Morris and Creaser (2003)		55.4	0.512528	0.512567	-0.747224		57.3	0.512527	0.512564	-0.731367
	GM 97 S23	Basaltic andesite to rhyolite	Mount Skukum Volcanic Complex	5.14	25.2	0.1238	0.512617	9e-06	-0.409646	0.175562	0.512571	0.925848	56.35	0.512565	0.114536	0.175587		57.3–55.4	Morris and Creaser (2003)		55.4	0.512572	0.512567	0.105696		57.3	0.512571	0.512564	0.123376
	GM 97 S39	Basaltic andesite to rhyolite	Mount Skukum Volcanic Complex	6.99	35.56	0.1191	0.512583	9e-06	-1.07288	0.175562	0.512539	0.934612	56.35	0.512565	-0.514995	0.175587		57.3–55.4	Morris and Creaser (2003)		55.4	0.51254	0.512567	-0.524404		57.3	0.512538	0.512564	-0.505587
	GM 97 S46	Basaltic andesite to rhyolite	Mount Skukum Volcanic Complex	8.76	45.31	0.1171	0.512597	8e-06	-0.799785	0.156056	0.512554	0.89329	56.35	0.512565	-0.227477	0.156078		57.3–55.4	Morris and Creaser (2003)		55.4	0.512555	0.512567	-0.237129		57.3	0.512553	0.512564	-0.217825
	GM 97 S93	Basaltic andesite to rhyolite	Mount Skukum Volcanic Complex	5.11	26.94	0.1149	0.512634	8e-06	-0.0780278	0.156056	0.512592	0.816509	56.35	0.512565	0.510203	0.156078		57.3–55.4	Morris and Creaser (2003)		55.4	0.512592	0.512567	0.500283		57.3	0.512591	0.512564	0.520123
	GM 97 B53	Basaltic andesite to rhyolite	Bennett Lake Volcanic Complex															57.3–55.4	Morris and Creaser (2003)
	GM 97 B55	Basaltic andesite to rhyolite	Bennett Lake Volcanic Complex	6.55	32.5	0.1224	0.512628	9e-06	-0.195069	0.175562	0.512583	0.893379	56.35	0.512565	0.33921	0.175587		57.3–55.4	Morris and Creaser (2003)		55.4	0.512584	0.512567	0.3302		57.3	0.512582	0.512564	0.348221
	GM 97 B56	Basaltic andesite to rhyolite	Bennett Lake Volcanic Complex	6.47	30.79	0.1277	0.512579	1e-05	-1.15091	0.195069	0.512532	1.03482	56.35	0.512565	-0.654879	0.195097		57.3–55.4	Morris and Creaser (2003)		55.4	0.512533	0.512567	-0.663244		57.3	0.512531	0.512564	-0.646513
	GM 97 B58	Basaltic andesite to rhyolite	Bennett Lake Volcanic Complex	8.57	42.08	0.1233	0.512624	8e-06	-0.273097	0.156056	0.512579	0.908973	56.35	0.512565	0.254699	0.156078		57.3–55.4	Morris and Creaser (2003)		55.4	0.512579	0.512567	0.245798		57.3	0.512578	0.512564	0.2636
	GM 97 B63	Basaltic andesite to rhyolite	Bennett Lake Volcanic Complex	7.56	36.93	0.1242	0.512586	9e-06	-1.01436	0.175562	0.51254	0.982605	56.35	0.512565	-0.493141	0.175587		57.3–55.4	Morris and Creaser (2003)		55.4	0.512541	0.512567	-0.501931		57.3	0.512539	0.512564	-0.484351
	GM 97 B70	Basaltic andesite to rhyolite	Bennett Lake Volcanic Complex	3.2	30.06	0.9646	0.512619	9e-06	-0.370632	0.175562	0.512263	N/A	56.35	0.512565	-5.89282	0.175587		57.3–55.4	Morris and Creaser (2003)		55.4	0.512269	0.512567	-5.79969		57.3	0.512257	0.512564	-5.98595
	GM 97 B74	Basaltic andesite to rhyolite	Bennett Lake Volcanic Complex	8.93	44.01	0.1228	0.512561	1.1e-05	-1.50203	0.214576	0.512516	1.0093	56.35	0.512565	-0.970816	0.214607		57.3–55.4	Morris and Creaser (2003)		55.4	0.512516	0.512567	-0.979775		57.3	0.512515	0.512564	-0.961857
	GM 97 B82	Basaltic andesite to rhyolite	Bennett Lake Volcanic Complex	6.52	31.84	0.1239	0.512574	7e-06	-1.24844	0.136549	0.512528	0.999634	56.35	0.512565	-0.7251	0.136568		57.3–55.4	Morris and Creaser (2003)		55.4	0.512529	0.512567	-0.733926		57.3	0.512528	0.512564	-0.716274
			Western Nothwest Territories
	R496	Continental tholeiites	Little Dal basalts	7.9	31.66	0.1508	0.512456		-3.55026	0	0.511685	1.70908	780	0.511632	1.03088			780	Dudas and Lustwerk (1997)
	TC1-1	Continental tholeiites	Little Dal basalts	7.75	31.51	0.1488	0.512411		-4.42808	0	0.51165	1.76154	780	0.511632	0.351264			780	Dudas and Lustwerk (1997)
	TC 1-2	Continental tholeiites	Little Dal basalts	7.52	30.27	0.1502	0.512553		-1.65809	0	0.511785	1.46184	780	0.511632	2.98675			780	Dudas and Lustwerk (1997)
	XBA- 15B	Continental tholeiites	Little Dal basalts	5.35	19.02	0.1701	0.51258		-1.1314	0	0.51171	2.03103	780	0.511632	1.52529			780	Dudas and Lustwerk (1997)
	XBA-25	Continental tholeiites	Little Dal basalts	6.01	21.98	0.1652	0.51255		-1.71661	0	0.511705	1.92048	780	0.511632	1.42873			780	Dudas and Lustwerk (1997)
	R420	Continental tholeiites	Little Dal basalts	4.01	13.69	0.1772	0.512547		-1.77513	0	0.511641	2.559	780	0.511632	0.170583			780	Dudas and Lustwerk (1997)
	19-4	Continental tholeiites	Tsezotene sills	6.6	24.91	0.1601	0.512522		-2.26281	0	0.511703	1.81774	780	0.511632	1.39125			779 ± 2	Dudas and Lustwerk (1997)		778	0.511705	0.511635	1.38184		780	0.511703	0.511632	1.39125
	43A	Continental tholeiites	Tsezotene sills	6.35	24.16	0.1589	0.512541		-1.89217	0	0.511728	1.72575	780	0.511632	1.88256			779 ± 2	Dudas and Lustwerk (1997)		778	0.51173	0.511635	1.87284		780	0.511728	0.511632	1.88256
	47	Continental tholeiites	Tsezotene sills	6.44	24.3	0.1602	0.512563		-1.46302	0	0.511744	1.70528	780	0.511632	2.18261			779 ± 2	Dudas and Lustwerk (1997)		778	0.511746	0.511635	2.17322		780	0.511744	0.511632	2.18261
			Northern Alberta
	Imperial Virginia Mills	Metagabbro	Buffalo Head domain	12.59	65.25	0.1166	0.511412		-23.9155	0	0.509878	2.73277	1998	0.510051	-3.38146			1998±5	Theriault and Ross (1991)		1993	0.509882	0.510057	-3.43344		2003	0.509875	0.510044	-3.32947
	Imperial Joussard	Metagabbro	Buffalo Head domain	4.07	20.82	0.118	0.511369		-24.7543	0	0.509562	2.83984	2324	0.509626	-1.25004			2324±5	Theriault and Ross (1991)		2319	0.509566	0.509632	-1.3013		2329	0.509558	0.509619	-1.19879
	H. B. East Virginia Hills	Metagabbro	Buffalo Head domain	5.65	30.68	0.1113	0.511293		-26.2368	0	0.509583	2.76712	2332	0.509615	-0.638873			2332±202	Theriault and Ross (1991)		2130	0.509732	0.509879	-2.88375		2534	0.509433	0.509351	1.6113
SEDIMENTARY / META-SEDIMENTARY UNITS																					SEDIMENTARY / META-SEDIMENTARY UNITS
Paleozoic metasediments			Yukon and Northwest Territories
	CJA- 108/3	Sandstone	Slats Creek Formation	4.69	21.2	0.1338	0.511908	5e-06	-14.2401	0.0975347	0.511439	2.38304	535	0.511949	-9.95283	0.0976661		535	Garzione et al. (1997)
	CJA- l08/4	Siltstone	Slats Creek Formation	4.67	28.1	0.1004	0.511595	5e-06	-20.3457	0.0975347	0.511243	2.1016	535	0.511949	-13.78	0.0976661		535	Garzione et al. (1997)
	95CG 17	Shale	Road River Group	1.66	8.33	0.1207	0.51213	7e-06	-9.90953	0.136549	0.511735	1.68904	500	0.511994	-5.06009	0.13672		500	Garzione et al. (1997)
	95CG 18	Shale	Road River Group	1.99	10.3	0.1171	0.512006	7e-06	-12.3284	0.136549	0.51163	1.8205	490	0.512007	-7.35351	0.136717		490	Garzione et al. (1997)
	95CG 19	Shale	Road River Group	1.76	8.8	0.1211	0.511854	5e-06	-15.2934	0.0975347	0.511475	2.14634	478	0.512022	-10.6889	0.097652		478	Garzione et al. (1997)
	95CG 16	Shale	Road River Group	3.92	21.7	0.1094	0.511951	7e-06	-13.4013	0.136549	0.511636	1.76656	440	0.512071	-8.50319	0.1367		440	Garzione et al. (1997)
	95CG 15	Shale	Road River Group	2.91	16.8	0.1046	0.511904	6e-06	-14.3181	0.117042	0.511618	1.7544	417	0.512101	-9.42166	0.117164		417	Garzione et al. (1997)
	95CG6	Shale	Road River Group	2.08	9.57	0.1317	0.512103	9e-06	-10.4362	0.175562	0.511749	1.96391	410	0.51211	-7.03902	0.175744		410	Garzione et al. (1997)
	95CG23	Shale	Michelle	5.31	32.2	0.0996	0.5121	6e-06	-10.4947	0.117042	0.511846	1.41793	390	0.512136	-5.66296	0.117156		390	Garzione et al. (1997)
	95CG 14	Shale	Canol	1.61	6.82	0.143	0.512245	6e-06	-7.66623	0.117042	0.511892	N/A	377	0.512152	-5.08511	0.117153		377	Garzione et al. (1997)
	95CG9	Shale	Canol	0.88	4.85	0.1098	0.512163	7e-06	-9.2658	0.136549	0.511892	1.46462	377	0.512152	-5.08592	0.136678		377	Garzione et al. (1997)
	95CG 1 *	Sandstone	Imperial	5.12	25.5	0.1216	0.512106	6e-06	-10.3777	0.117042	0.511809	1.74485	373	0.512158	-6.80603	0.117151		373	Garzione et al. (1997)
	95CG2'	Shale	Imperial	6.76	36.5	0.1119	0.512058	7e-06	-11.314	0.136549	0.511785	1.65078	373	0.512158	-7.28066	0.136677		373	Garzione et al. (1997)
	95CG5a	Sandstone	Imperial	1.86	9.57	0.1173	0.511863	7e-06	-15.1179	0.136549	0.511579	2.04822	370	0.512161	-11.376	0.136676		370	Garzione et al. (1997)
	95CG4*	Sandstone	Imperial	4.42	22.1	0.1208	0.512152	9e-06	-9.48037	0.175562	0.51186	1.65503	369	0.512163	-5.90852	0.175725		369	Garzione et al. (1997)
	95CG3*	Shale	Imperial	7.34	37.6	0.1181	0.512099	7e-06	-10.5142	0.136549	0.511814	1.69239	369	0.512163	-6.81597	0.136675		369	Garzione et al. (1997)
	95CG7*	Shale	Imperial	6.34	31.6	0.1212	0.512199	6e-06	-8.56355	0.117042	0.511909	1.58527	365	0.512168	-5.04832	0.117149		365	Garzione et al. (1997)
	95CG8*	Siltstone	Imperial	4.05	20.1	0.1217	0.512137	6e-06	-9.77298	0.117042	0.511846	1.69579	365	0.512168	-6.28219	0.117149		365	Garzione et al. (1997)
	95CG 12	Sandstone	Tuttle	1.65	8.43	0.1181	0.511998	8e-06	-12.4844	0.156056	0.51172	1.85207	360	0.512174	-8.87835	0.156197		360	Garzione et al. (1997)
	95CG 1 1	Sandstone	Tuttle	1.01	6.09	0.1007	0.511976	7e-06	-12.9136	0.136549	0.511742	1.5978	355	0.512181	-8.56842	0.13667		355	Garzione et al. (1997)
	95CG 10	Shale	Ford Lake	6.66	37.3	0.108	0.51197	6e-06	-13.0306	0.117042	0.511723	1.71612	350	0.512187	-9.0735	0.117145		350	Garzione et al. (1997)
	95CG20	Shale	Ford Lake	5.09	28.8	0.1069	0.511972	7e-06	-12.9916	0.136549	0.511731	1.69571	345	0.512194	-9.04259	0.136667		345	Garzione et al. (1997)
	C52501	Shale	Besa River	8.05	40	0.1218	0.511966	5e-06	-13.1087	0.0975347	0.511682	1.97874	356	0.51218	-9.71167	0.097622		356	Garzione et al. (1997)
	95CG2 1	Shale	Hart River	5.92	33.7	0.1064	0.511995	6e-06	-12.543	0.117042	0.511758	1.65544	340	0.5122	-8.62916	0.117142		340	Garzione et al. (1997)
	95CG32	Sandstone	Keno Hill	1.76	9.65	0.11102	0.511888	6e-06	-14.6302	0.117042	0.511644	1.88697	335	0.512207	-10.9737	0.11714		335	Garzione et al. (1997)
	95CG24	Shale	Blackie	1.24	12.1	0.0616	0.51207	6e-06	-11.0799	0.117042	0.511945	1.09486	310	0.512239	-5.736	0.117133		310	Garzione et al. (1997)
	95CG22	Shale	Etrain	5.38	28.7	0.1135	0.512056	5e-06	-11.353	0.0975347	0.511829	1.68002	305	0.512245	-8.11868	0.0976095		305	Garzione et al. (1997)
	47BR-95B	Shale	Jungle Creek	4.79	27.8	0.1041	0.511966	8e-06	-13.1087	0.156056	0.511779	1.66091	275	0.512284	-9.86385	0.156163		275	Garzione et al. (1997)
	95CG33	Shale	Mt Christie	3.34	18.1	0.1116	0.51221	6e-06	-8.34897	0.117042	0.512014	1.4206	268	0.512293	-5.4405	0.11712		268	Garzione et al. (1997)
			Eastern Yukon
	105I-796002	Sandstone	Howard Pass (Earn Group)	0.96	5.11	0.1133	0.511987		-12.699		0.511689	1.78059	402	0.51212	-8.42471			419-385Ma (Devonian)	Cousens (2007)		419	0.511676	0.512098	-8.24351		385	0.511701	0.512142	-8.60586
	105I-796015	Black shale	Howard Pass (Earn Group)	4.49	22.51	0.1205	0.511882		-14.7472		0.511565	2.08731	402	0.51212	-10.8451			419-385Ma (Devonian)	Cousens (2007)		419	0.511551	0.512098	-10.6797		385	0.511578	0.512142	-11.0105
	105I-796018	Mudstone	Howard Pass (Road River Group)	9.3	37.78	0.1489	0.511947		-13.4793		0.511527	N/A	431	0.512083	-10.8591			443-419 (Silurian)	Cousens (2007)		443	0.511515	0.512067	-10.7859		419	0.511538	0.512098	-10.9322
	105I-796047	Carbonaceous shale	Howard Pass (Road River Group)	3.4	16.57	0.124	0.512087		-10.7483		0.511737	1.82327	431	0.512083	-6.75259			443-419 (Silurian)	Cousens (2007)		443	0.511727	0.512067	-6.64105		419	0.511747	0.512098	-6.86411
	105I-796098	Siliceous shale	Howard Pass (Road River Group)	3.59	17.61	0.1233	0.511758		-17.1661		0.51141	2.35818	431	0.512083	-13.1387			443-419 (Silurian)	Cousens (2007)		443	0.5114	0.512067	-13.0263		419	0.51142	0.512098	-13.2512
	105I-796110	Mudstone	Howard Pass (Road River Group)	3.72	21.86	0.1028	0.511388		-24.3837		0.511098	2.42793	431	0.512083	-19.2341			443-419 (Silurian)	Cousens (2007)		443	0.51109	0.512067	-19.0904		419	0.511106	0.512098	-19.3779
	105O-798071	Shale	Jason deposit (Earn Group)	5.28	30.98	0.1031	0.511743		-17.4587		0.511452	1.95066	431	0.512083	-12.3182			419-385Ma (Devonian)	Cousens (2007)		419	0.51146	0.512098	-12.4617		385	0.511483	0.512142	-12.8681
	ORO103	Silty limestone	Howard Pass (Rabbitkettle Fm)	2.12	11.85	0.1082	0.511495		-22.2964		0.511147	2.39858	491	0.512005	-16.7646			497-485.4 Ma (Upper Cambrian Rabbitkettle Fm)	Cousens (2007); Age of Rabbitkettle Fm from Gordey and Anderson (1993)		497	0.511143	0.511998	-16.6968		485.4	0.511151	0.512013	-16.8279
	ORO122	Baritic silty shale	Howard Pass (Earn Group)	4.29	29.62	0.0875	0.511819		-15.9762		0.511589	1.61979	402	0.51212	-10.3789			419-385Ma (Devonian)	Cousens (2007)		419	0.511579	0.512098	-10.1417		385	0.511598	0.512142	-10.6162
	105I-SL0108	Siltstone	Summit Lake (Earn Group)	4.28	29.64	0.0874	0.511746		-17.4002		0.511516	1.70594	402	0.51212	-11.7993			419-385Ma (Devonian)	Cousens (2007)		419	0.511506	0.512098	-11.5618		385	0.511526	0.512142	-12.0366
Windermere Supergroup			Yukon and Northwest Territories
	95CG28	Siltstone	Windermere SG (Hyland Group)	5.16	33.1	0.0941	0.511229	7e-06	-27.4853	0.136549	0.510871	2.45279	580	0.51189	-19.9081	0.136748		580	Garzione et al. (1997)
	95CG29	Sandstone	Windermere SG (Hyland Group)	3.33	16.7	0.1205	0.511316	6e-06	-25.7882	0.117042	0.510858	3.00058	580	0.51189	-20.1686	0.117213		580	Garzione et al. (1997)
	95CG26	Shale	Windermere SG (Hyland Group)	6.58	37.2	0.1069	0.511381	7e-06	-24.5202	0.136549	0.510978	2.53023	575	0.511897	-17.9464	0.136746		575	Garzione et al. (1997)
	95CG27	Sandstone	Windermere SG (Hyland Group)	1.15	6.33	0.1094	0.511416	7e-06	-23.8375	0.136549	0.511004	2.53991	575	0.511897	-17.4467	0.136746		575	Garzione et al. (1997)
	95CG25	Shale	Windermere SG (Hyland Group)	4.47	26.6	0.1017	0.51148	6e-06	-22.589	0.117042	0.5111	2.28058	570	0.511903	-15.6904	0.11721		570	Garzione et al. (1997)
Mackenzie Mountains Supergroup			Northwest Territories
	CJ-77-156	Argillite	Mackenzie Mountains SG (Mudcracked Fm., Lower Little Dal Gp.)	5	25.24	0.1198	0.511969		-13.0501		0.511293	1.93203	860	0.511529	-4.59926			1000-720 (Early Neoproterozoic )	Rainbird et al. (1997)		1000	0.511183	0.511347	-3.21554		720	0.511404	0.51171	-5.98072
	CJ-77-166	Shaly sandstone	Mackenzie Mountains SG (Unit K5 Katherine Gp.)	5.8	27.44	0.1277	0.512113		-10.2411		0.511393	1.85556	860	0.511529	-2.65524			1000-720 (Early Neoproterozoic )	Rainbird et al. (1997)		1000	0.511275	0.511347	-1.41315		720	0.51151	0.51171	-3.89531
	CJ-77-167B	Carbonaceous shale	Mackenzie Mountains SG (Unit K6 Katherine Gp.)	14.52	75.19	0.1168	0.511955		-13.3232		0.511296	1.8944	860	0.511529	-4.54216			1000-720 (Early Neoproterozoic )	Rainbird et al. (1997)		1000	0.511189	0.511347	-3.10438		720	0.511404	0.51171	-5.9776
	CJ-77-182	Shaly sandstone	Mackenzie Mountains SG (Unit K7 Katherine Gp.)	7.59	41.8	0.1097	0.511954		-13.3427		0.511335	1.76727	860	0.511529	-3.77884			1000-720 (Early Neoproterozoic )	Rainbird et al. (1997)		1000	0.511234	0.511347	-2.21289		720	0.511436	0.51171	-5.34226
Wernecke Supergroup			Eastern Yukon
	DT-92-77-1B	Wernecke Breccia	Wernecke SG	6.88	36.26	0.1147	0.511583	1.2e-05	-20.5798	0.234083	0.51038	2.42104	1595	0.510575	-3.82229	0.235029		1595	Thorkelson et al. (2005)
	DT-93-11-3B	Wernecke Breccia	Wernecke SG	2.81	13.51	0.1255	0.511507	8e-06	-22.0624	0.156056	0.510191	2.84425	1595	0.510575	-7.52884	0.156686		1595	Thorkelson et al. (2005)
	DT-93-107-2B	Wernecke Breccia	Wernecke SG	3.04	13.95	0.1317	0.511841	1.1e-05	-15.547	0.214576	0.51046	2.44547	1595	0.510575	-2.26052	0.215443		1595	Thorkelson et al. (2005)
	DT-93-160-3B	Wernecke Breccia	Wernecke SG	6.76	32.85	0.1245	0.511419	8e-06	-23.779	0.156056	0.510114	2.96069	1595	0.510575	-9.04701	0.156686		1595	Thorkelson et al. (2005)
	DT-94-13-1	Wernecke Breccia	Wernecke SG	6.44	38.65	0.1008	0.511405	8e-06	-24.0521	0.156056	0.510348	2.36259	1595	0.510575	-4.45385	0.156686		1595	Thorkelson et al. (2005)
	DT-92-55-1B	Quartet Group (siliciclastic)	Wernecke SG	8.08	45.83	0.1066	0.511431	8e-06	-23.5449	0.156056	0.510232	2.45297	1710	0.510426	-3.79527	0.156732		1710	Thorkelson et al. (2005)
	DT-92-27-2	Quartet Group (siliciclastic)	Wernecke SG	9.14	49.91	0.1107	0.511372	1.5e-05	-24.6958	0.292604	0.510127	2.63592	1710	0.510426	-5.85451	0.293872		1710	Thorkelson et al. (2005)
	DT-92-80-1B	Gillespie Lake Group (siliciclastic)	Wernecke SG	7.77	51.06	0.092	0.511332	8e-06	-25.4761	0.156056	0.510297	2.28335	1710	0.510426	-2.51802	0.156732		1710	Thorkelson et al. (2005)
	DT-93-129-1B	Gillespie Lake Group (dolostone)	Wernecke SG	2.69	15.5	0.1049	0.511392	8e-06	-24.3057	0.156056	0.510212	2.46889	1710	0.510426	-4.18478	0.156732		1710	Thorkelson et al. (2005)
	DT-92-129-2B	Gillespie Lake Group (siliciclastic)	Wernecke SG	2.16	7.44	0.1756	0.5121	1.3e-05	-10.4947	0.25359	0.510125	N/A	1710	0.510426	-5.89127	0.254689		1710	Thorkelson et al. (2005)
	DT-92-99-1	Gillespie Lake Group (siliciclastic)	Wernecke SG	2.4	9.84	0.1473	0.511691	9e-06	-18.4731	0.175562	0.510034	N/A	1710	0.510426	-7.66888	0.176323		1710	Thorkelson et al. (2005)
	DT-92-126-1	Gillespie Lake Group (siliciclastic)	Wernecke SG	5.92	29.74	0.1204	0.511508	2.1e-05	-22.0428	0.409646	0.510154	2.68853	1710	0.510426	-5.32726	0.411421		1710	Thorkelson et al. (2005)
	DT-92-129-1	Gillespie Lake Group (siliciclastic)	Wernecke SG	2.39	11.7	0.1236	0.511691	9e-06	-18.4731	0.175562	0.510301	2.47789	1710	0.510426	-2.44708	0.176323		1710	Thorkelson et al. (2005)
	DT-92-132-7	Gillespie Lake Group (siliciclastic)	Wernecke SG	4.2	24.25	0.1049	0.511347	1.2e-05	-25.1835	0.234083	0.510167	2.5311	1710	0.510426	-5.06639	0.235098		1710	Thorkelson et al. (2005)

## Sheet: References
References
Abraham, A. C., Francis, D., & Polvé, M. (2001). Recent alkaline basalts as probes of the lithospheric mantle roots of the northern Canadian Cordillera. Chemical Geology, 175(3-4), 361-386.
Blusson, S. L. (1968). Geology and tungsten deposits near the headwaters of Flat River, Yukon Territory and southwestern district of Mackenzie, Canada (Vol. 67, No. 22). Department of Energy, Mines and Resources
Cousens, B. L. (2007). Radiogenic isotope studies of Pb-Zn mineralization in the Howards Pass area, Selwyn Basin. Mineral and Energy Resource Potential of the Proposed Expansion to the Nahanni National Park Reserve, North Cordillera, Northwest Territories: Geological Survey of Canada, Open File, 5344, 14.
Cousens, B. L., & Bevier, M. L. (1995). Discerning asthenospheric, lithospheric, and crustal influences on the geochemistry of Quaternary basalts from the Iskut–Unuk rivers area, northwestern British Columbia. Canadian Journal of Earth Sciences, 32(9), 1451-1461.
Dudás, F. Ö., & Lustwerk, R. L. (1997). Geochemistry of the Little Dal basalts: continental tholeiites from the Mackenzie Mountains, Northwest Territories, Canada. Canadian Journal of Earth Sciences, 34(1), 50-58.
Garzione, C. N., Patchett, P. J., Ross, G. M., & Nelson, J. (1997). Provenance of Paleozoic sedimentary rocks in the Canadian Cordilleran miogeocline: a Nd isotopic study. Canadian Journal of Earth Sciences, 34(12), 1603-1618.
Gebru, A. L. (2017). Petrogenesis of Granitoids in the Vicinity of the Mactung Tungsten Skarn Deposit, NE Yukon-Northwest Territories: Characterization of Skarn Mineralization and Causative Plutons through Geological, Petrochemical, Mineralogical, and Geochronological Analysis. UnPub PhD Thesis University of New Brunswick, New Brunswick, Canada.
Goldstein, S. L., O'nions, R. K., & Hamilton, P. J. (1984). A Sm-Nd isotopic study of atmospheric dusts and particulates from major river systems. Earth and planetary Science letters, 70(2), 221-236.
Gordey, S. P., & Anderson, R. G. (1993). Evolution of the northern Cordilleran miogeocline, Nahanni map area (105I), Yukon and Northwest Territories. Geol. Surv. Canada Mem., 428, 214p.
Jacobsen, S. B., & Wasserburg, G. J. (1980). Sm-Nd isotopic evolution of chondrites. Earth and Planetary Science Letters, 50(1), 139-155.
Mair, J. L., Farmer, G. L., Groves, D. I., Hart, C. J., & Goldfarb, R. J. (2011). Petrogenesis of postcollisional magmatism at Scheelite Dome, Yukon, Canada: evidence for a lithospheric mantle source for magmas associated with intrusion-related gold systems. Economic Geology, 106(3), 451-480.
Morris, G. A., & Creaser, R. A. (2003). Crustal recycling during subduction at the Eocene Cordilleran margin of North America: a petrogenetic study from the southwestern Yukon. Canadian Journal of Earth Sciences, 40(12), 1805-1821.
Rainbird, R. H., McNicoll, V. J., Theriault, R. J., Heaman, L. M., Abbott, J. G., Long, D. G. F., & Thorkelson, D. J. (1997). Pan-continental river system draining Grenville Orogen recorded by U-Pb and Sm-Nd geochronology of Neoproterozoic quartzarenites and mudrocks, northwestern Canada. The Journal of Geology, 105(1), 1-17.
Rasmussen, K.L. (2013) The timing, composition, and petrogenesis of syn- to post-accretionary magmatism in the northern Cordilleran miogeocline, eastern Yukon and southwestern Northwest Territories. Ph.D. Thesis, University of British Columbia, Vancouver, British Columbia, Canada, 788 pp.
Selby, D., Creaser, R. A., Heaman, L. M., & Hart, C. J. (2003). Re-Os and U-Pb geochronology of the Clear Creek, Dublin Gulch, and Mactung deposits, Tombstone Gold Belt, Yukon, Canada: absolute timing relationships between plutonism and mineralization. Canadian Journal of Earth Sciences, 40(12), 1839-1852.
Thériault, R. J., & Ross, G. M. (1991). Nd isotopic evidence for crustal recycling in the ca. 2.0 Ga subsurface of western Canada. Canadian Journal of Earth Sciences, 28(8), 1140-1147.
Thorkelson, D. J., Abbott, J. G., Mortensen, J. K., Creaser, R. A., Villeneuve, M. E., McNicoll, V. J., & Layer, P. W. (2005). Early and middle Proterozoic evolution of Yukon, Canada. Canadian Journal of Earth Sciences, 42(6), 1045-1071.
ThorkeThorkelson, D. J., Mortensen, J. K., Creaser, R. A., Davidson, G. J., & Abbott, J. G. (2001). Early Proterozoic magmatism in Yukon, Canada: constraints on the evolution of northwestern Laurentia. Canadian Journal of Earth Sciences, 38(10), 1479-1494.lson et al. (2001)
Villeneuve, M. E., Thériault, R. J., & Ross, G. M. (1991). U–Pb ages and Sm–Nd signature of two subsurface granites from the Fort Simpson magnetic high, northwest Canada. Canadian Journal of Earth Sciences, 28(7), 1003-1008.

## Sheet: G49801
Elongo, V., et al., 2022, Ancient roots of tungsten in western North America: Geology, v. 50, https://doi.org/10.1130/G49801.1
